# Supplementary material for: Patients’ views of wearable devices and AI in healthcare: findings from the ComPaRe e-cohort
Source: PubMed Central journal article supplement (PMC6572821; doi:10.1038/s41746-019-0132-y), 2019-06-14

**Supplementary table 1: Patients' evaluation of the opportunity and danger of the use of digital technologies and AI in healthcare (n=1180).** Ratings ranged from 0 (no opportunity/no danger) to 10 (high opportunity/high danger). Results are expressed as raw number – raw proportion (%) – proportion after statistical weighting (%)

|                                               | <b>Small opportunity<br/>(rating &lt;3)<br/>N=74</b> | <b>Moderate opportunity<br/>(rating 3–7)<br/>N=543</b> | <b>Great opportunity<br/>(rating &gt;7)<br/>N=563</b> |
|-----------------------------------------------|------------------------------------------------------|--------------------------------------------------------|-------------------------------------------------------|
| <b>Small danger (rating &lt;3)<br/>N=340</b>  |                                                      |                                                        |                                                       |
| Raw number                                    | 19                                                   | 80                                                     | 241                                                   |
| Raw %                                         | 2%                                                   | 7%                                                     | 20%                                                   |
| Weighted %                                    | 2%                                                   | 7%                                                     | 20%                                                   |
| <b>Moderate danger (rating 3–7)<br/>N=677</b> |                                                      |                                                        |                                                       |
| Raw number                                    | 15                                                   | 406                                                    | 256                                                   |
| Raw %                                         | 1%                                                   | 34%                                                    | 22%                                                   |
| Weighted %                                    | 1%                                                   | 34%                                                    | 23%                                                   |
| <b>Great danger (rating &gt;7)<br/>N=163</b>  |                                                      |                                                        |                                                       |
| Raw number                                    | 40                                                   | 57                                                     | 66                                                    |
| Raw %                                         | 3%                                                   | 5%                                                     | 6%                                                    |
| Weighted %                                    | 3%                                                   | 4%                                                     | 5%                                                    |

**Supplementary table 2: Patients' perceived benefits of the use of digital technologies and AI in healthcare.** Categories presented were defined by thematic analysis of patients' open-ended answers

**Technology may improve access to care by**

- Making some care procedures accessible to everybody
- Facilitating access to care in rural zones
- Facilitating the monitoring and follow-up for persons with poor mobility
- Facilitating the engagement in care of young people
- Offering fun and de-dramatizing health information
- Offering easy to use tools (apps, websites) to help patients in their care

**Technology may facilitate caregivers' work by**

- Automatizing repetitive tasks
- Providing tools to help doctors' work
- Helping doctors to choose the right treatment for the right person
- Helping care professionals monitor the treatment efficacy and its side effects
- Enabling a more personalized care
- Enabling a more global vision of patients

**Technology may improve the follow-up of patients with chronic conditions by**

- Helping in diagnosing health problems
- Providing reliable health data measurements
- Providing accurate health data measurements
- Enabling remote monitoring
- Enabling continuous monitoring
- Enabling telecare
- Enabling a more anonymous care
- Enabling "rich" data capture that will help in better understanding better patients' status
- Reducing subjectivity in care
- Enabling data analyses beyond human capabilities
- Improving the reactivity of care
- Enabling automatic (AI driven) adjustments of treatment
- Warning, in real time, patients or their physicians about problems
- Accelerating care procedures and the care pathway
- Facilitating the comprehension of patients' care pathways

**Technology may reduce the burden of care for patients by**

- Facilitating the obtention of appointments for patients
- Improving patients knowledge of their own diseases
- Providing immediately accessible data and information to reassure patients
- Improving patients' autonomy
- Improving patients' responsibility in their care
- Lowering the burden of treatment (e.g. limiting the number of visits)
- Facilitating care in foreign countries with tools available in multiple languages

**Technology may improve communication in care by**

- Facilitating information sharing between clinicians
- Facilitating information sharing between patients and clinicians
- Facilitating information sharing between patients and their entourage

Facilitating information sharing between patients

**Technology may offer economic and environmental friendly solutions in care by**

Saving time for physicians

Saving time for patients

Using less paper

**Technology may improve prevention of diseases (primary or secondary)**

Helping patients respecting a healthy lifestyle

Facilitating the prediction and prevention of health events

**Technology may improve the safety of care by**

Lowering the risk of medical mistakes

Facilitating the secured and easily available storage of data

Facilitating the traceability of information

**Technology may accelerate research**

By facilitating the capture of rich data for research purposes

**Supplementary table 3: Patients' perceived risks of the use of digital technologies and AI in healthcare.** Categories presented were defined by thematic analysis of patients' open-ended answers

**Technology may not be accessible to everybody**

Lack of education will limit the access to this type of care  
This type of care will not be available everywhere  
Costs will limit access to this type of care for everyone

**Technology will have a negative effect on patients' health behaviors**

Risk of addiction to quantification for patients  
False reassurance from digital tools may delay consultation with a professional  
Increased risk of self medication for patients  
Digital monitoring may generate anxiety or stress for patients  
Technology may de-responsibilize patients

**Technology will have a negative effect on patient-caregiver relationships**

Digital technologies may discourage caregivers/researchers to look for other non captured information  
Digital tools may threaten personalization of care  
Artificial intelligence may de-responsibilize caregivers (Who will hold responsibility in case there is an error?)  
Digital data may hinder the importance given to patients' words

**Technology may have reliability issues**

Risk of diagnostic errors  
Reliability issues (bugs, equipment failure...)  
May provide incorrect information to patients  
Dematerialized information may pose problems of storage and availability

**Technology may intrude in patients' lives**

Alerts and monitoring may intrude in patients' private lives  
Technology may hinder patients' freedom (need to have access to internet, etc.)  
May threaten privacy of patients' information

**Technology increases the risk of data misuses**

Information gathered using digital tools may be misunderstood by patients or their caregivers  
Necessitates an ethics reflexion before being used in care  
Risk of spying on patients  
Data collected may be used without patients' consent or sold

**Replacing human in care is unwanted**

May put some caregivers out of work  
Loss of human contact in care  
Loss of human control in care  
Technology will not encompass all individual situations lived by patients

**Technology is vulnerable to hacking**

Wearable devices are at risk of hacking  
Security risk for data gathered on patients (hacking...)

**Technology will require a complete (complex and expensive) overhaul of the care system**

Necessitates a complete overhaul of the current care organization

Digital tools are not environmentally friendly (need to be manufactured, energy based, etc.)

**Supplementary table 4: Patients’ characteristics in each cluster automatically identified from answers to the readiness vignettes (n=1176)**

Patients were grouped by the similarity to their answers to the four vignettes using a k-means algorithm accounting for the weights of the calibrated dataset. Participants with missing data were dropped from analysis. Patients with missing data in at least one of their vignettes’ evaluations were dropped from analysis.

| Characteristic                                      | Cluster 1<br>N=154<br><br>“Against any use of BMDs and AI care” | Cluster 2<br>N=75<br><br>“Against BMDs and AI for continuous remote monitoring” | Cluster 3<br>N=109<br><br>“Against automation of physical therapy” | Cluster 4<br>N=78<br><br>“Against automatic chatbots to answer calls” | Cluster 5<br>N=479<br><br>“BMDs and AI only with human control” | Cluster 6<br>N=269<br><br>“Accept the automation of some care processes” |
|-----------------------------------------------------|-----------------------------------------------------------------|---------------------------------------------------------------------------------|--------------------------------------------------------------------|-----------------------------------------------------------------------|-----------------------------------------------------------------|--------------------------------------------------------------------------|
| <b>Readiness score (min: 0; max: 6) – mean (SD)</b> |                                                                 |                                                                                 |                                                                    |                                                                       |                                                                 |                                                                          |
| • AI to screen for skin cancer                      | 1.1 (0.3)                                                       | 2.2 (0.3)                                                                       | 2.6 (0.2)                                                          | 2.9 (0.2)                                                             | 2.9 (0.0)                                                       | 3.5(0.2)                                                                 |
| • Continuous remote monitoring to prevent flares    | 0.6 (0.2)                                                       | 0.5 (0.1)                                                                       | 2.7 (0.2)                                                          | 3.0 (0.3)                                                             | 3.2 (0.1)                                                       | 4.3 (0.2)                                                                |
| • Smart clothes to guide physical therapy           | 0.4 (0.2)                                                       | 3.8 (0.2)                                                                       | 0.3 (0.1)                                                          | 3.8 (0.3)                                                             | 3.1 (0.0)                                                       | 5.8 (0.1)                                                                |
| • Chatbots to assess symptom severity               | 0.5 (0.2)                                                       | 4.0 (0.3)                                                                       | 3.7 (0.2)                                                          | 0.2 (0.1)                                                             | 3.9 (0.1)                                                       | 5.0 (0.2)                                                                |
| <b>Age (years) – mean (SD)</b>                      | 56.4 (3.1)                                                      | 52.0 (5.0)                                                                      | 56.5 (2.6)                                                         | 53.9 (3.0)                                                            | 53.7 (1.4)                                                      | 54.7 (1.6)                                                               |
| <b>Female sex (%)</b>                               | 37                                                              | 40                                                                              | 60                                                                 | 70                                                                    | 50                                                              | 68                                                                       |
| <b>Higher education (%)</b>                         | 10                                                              | 20                                                                              | 12                                                                 | 14                                                                    | 11                                                              | 10                                                                       |
| <b>Number of chronic conditions – mean (SD)</b>     | 2.4 (0.3)                                                       | 2.1 (0.2)                                                                       | 3.0 (0.4)                                                          | 3.7 (0.9)                                                             | 2.7 (0.2)                                                       | 2.6 (0.2)                                                                |
| <b>Time since diagnosis (years) – Mean (SD)</b>     | 19.5 (2.9)                                                      | 15.1 (2.1)                                                                      | 21.2 (3.1)                                                         | 19.0 (1.8)                                                            | 18.5 (1.3)                                                      | 20.9 (1.6)                                                               |
| <b>Already use e-health or m-health tools (%)</b>   | 5                                                               | 69                                                                              | 50                                                                 | 57                                                                    | 47                                                              | 37                                                                       |

**Supplementary figure 1: Aggregated answers to the 4 vignettes evaluating patients' readiness to integrate specific BMD and AI-based interventions in their care – raw data (n=1176)** Estimates were obtained using raw data (without calibration).

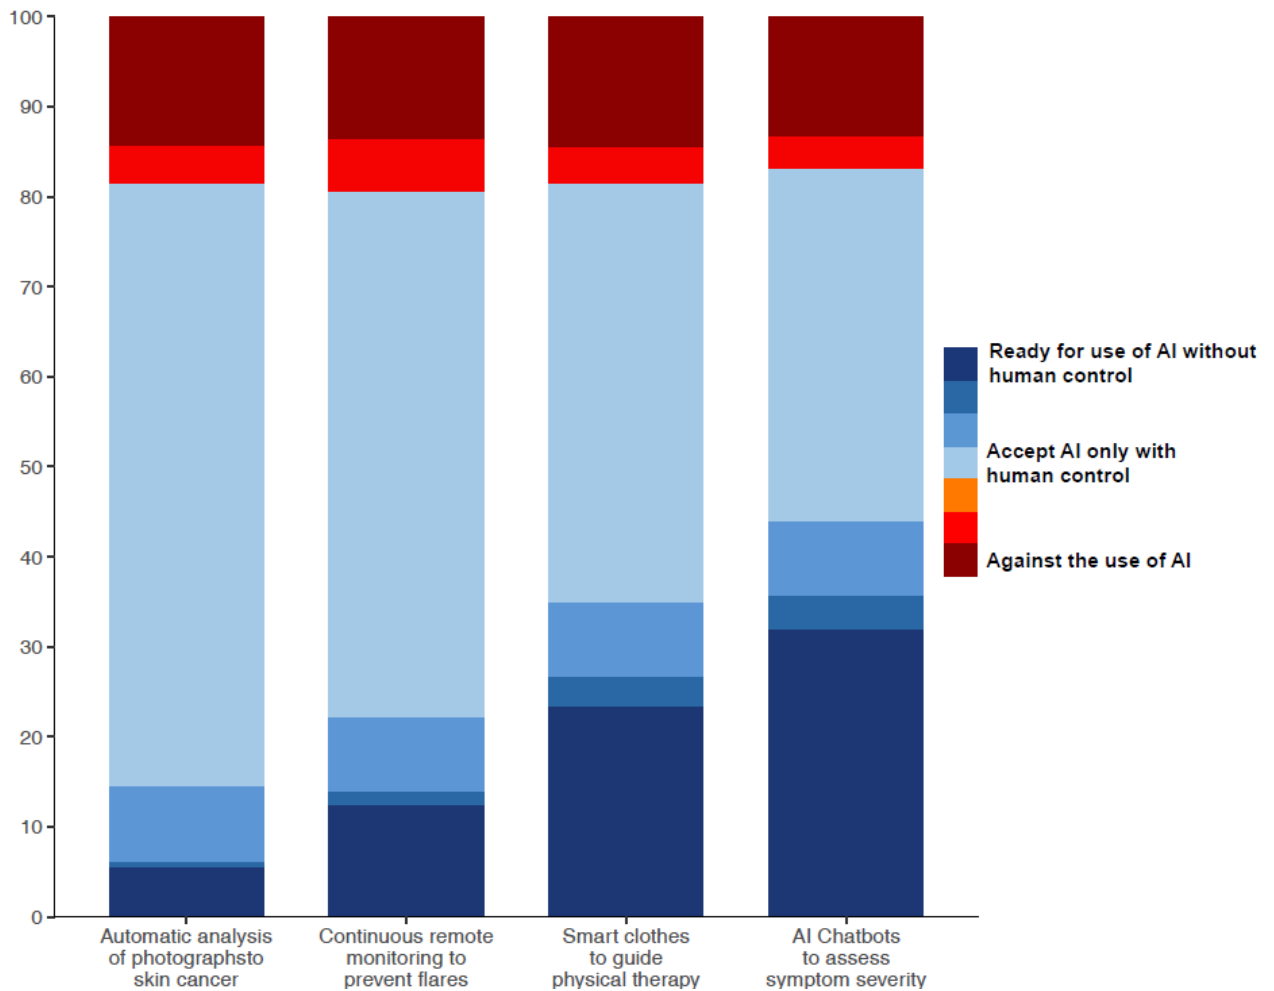

Supplement: 41746_2019_132_MOESM1_ESM.pdf [file 41746_2019_132_MOESM1_ESM.pdf]
